# Supplementary material
Source: PubMed Central journal article supplement (PMC3063898)

# Figure S1

## FACS analysis of *ex vivo* cultured VPC

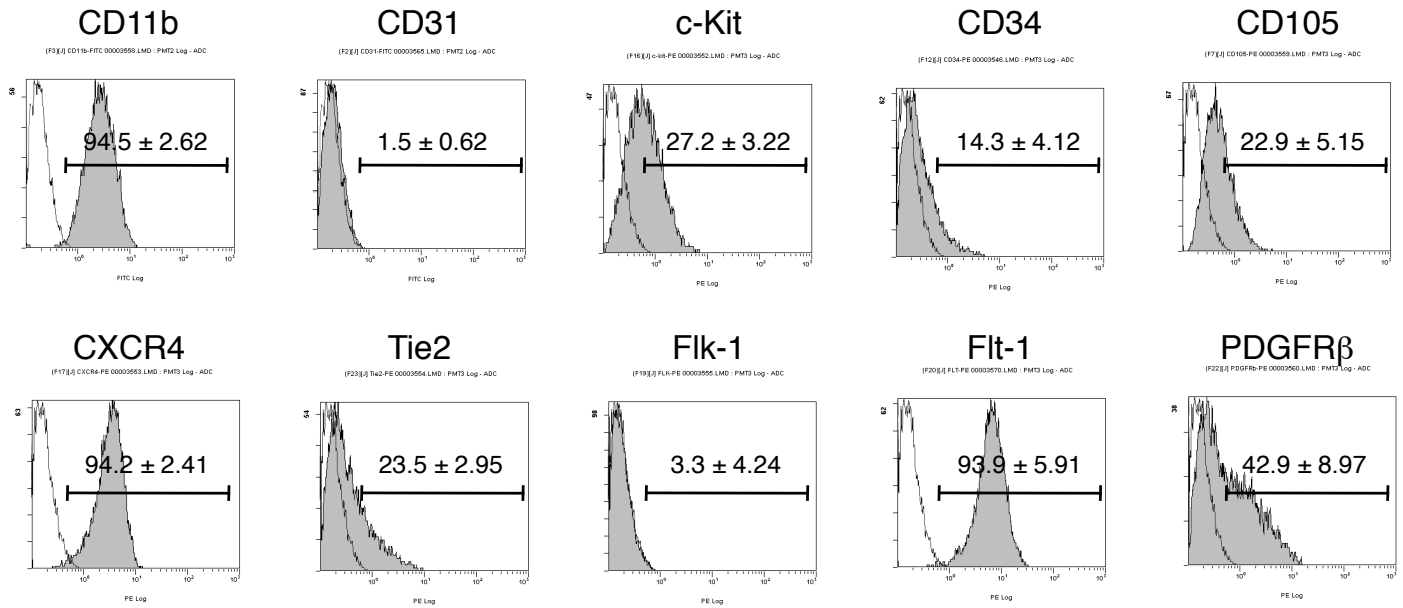

## TaqMan qPCR analysis (normalized to freshly isolated BMMNC)

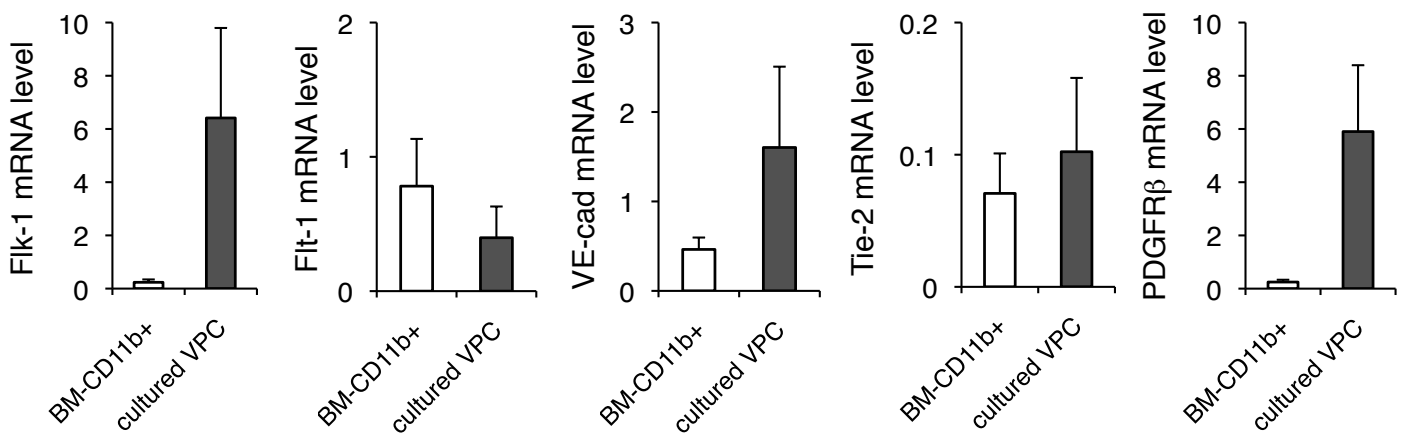

Supplement: NIHMS268657-supplement-1.pdf [file NIHMS268657-supplement-1.pdf]
