# Supplementary material
Source: PubMed Central journal article supplement (PMC3063898)

# Figure S2

Contrast enhanced US  
(movie files are available)

Control  
KP-1N xenograft

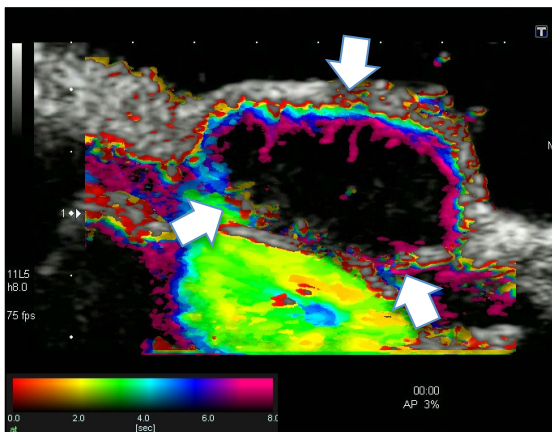

VPC transplanted  
KP-1N xenograft

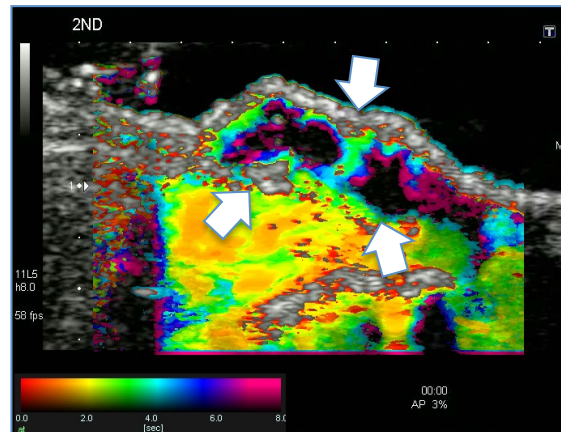

Supplement: NIHMS268657-supplement-2.pdf [file NIHMS268657-supplement-2.pdf]
