# Supplementary material
Source: PubMed Central journal article supplement (PMC3063898)

# Figure S3

Control  
KP-1N xenograft

VPC transplanted  
KP-1N xenograft

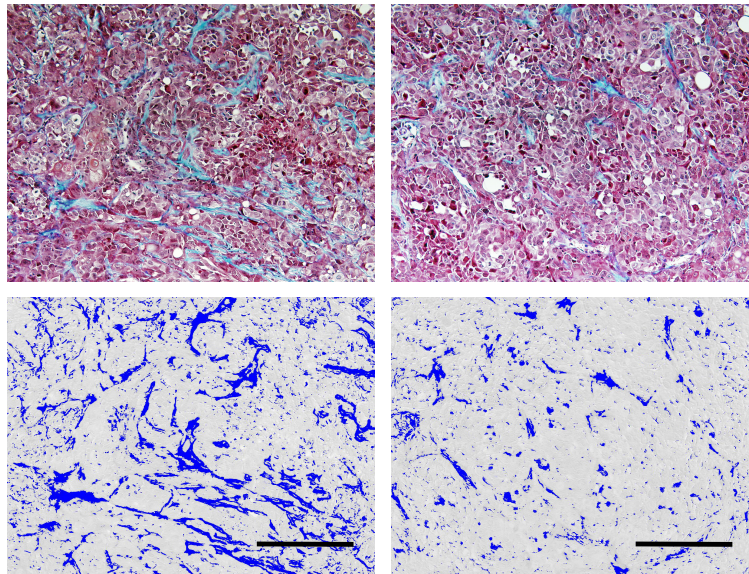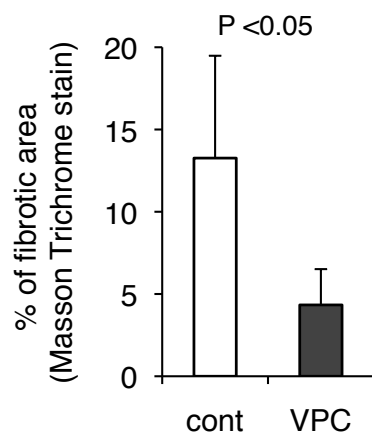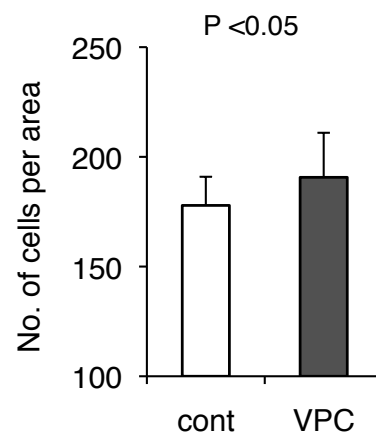

Supplement: NIHMS268657-supplement-3.pdf [file NIHMS268657-supplement-3.pdf]
